# Supplementary material for: SNRPB promotes the progression of hepatocellular carcinoma via regulating cell cycle, oxidative stress, and ferroptosis
Source: Aging (Albany NY). 2024 Jan 5;16(1):348–66. doi: 10.18632/aging.205371 (PMC10817389; doi:10.18632/aging.205371)
Supplement: Supplementary Table 1 [file aging-16-205371-s001.xlsx]

## Sheet: Sheet1
Supplementary Table 1. The clinical features of the patients.
Status	Sample number	Tumor_tissue_site	Gender.x	Age_at_initial_pathologic_diagnosis.x	Distant metastatic site	Primary organ or not	Metastasis or not	Histological_type.x	Stage_event.pathologic_stage	Tumor size(CM)	Lesion site	Tumor texture	Tumor section color	Capsule	Pathological morphology	Infiltration degree	Vascular invasion	T	N	M	AJCC 7th edition clinical stage	Hepatitis history
Tumor/paired adjacent normal	1	Liver	woman	50	NO	YES	NO	Hepatocellular Carcinoma	Ⅰ	10*6.3*3	Liver				Hepatocellular Carcinoma			T2	N0	M0	2
Tumor/paired adjacent normal	2	Liver	man	56	NO	YES	NO	Hepatocellular Carcinoma	Ⅱ		Right anterior lobe of liver								N0	M0
Tumor/paired adjacent normal	3	Liver	woman	54	NO	YES	NO	Hepatocellular Carcinoma	Ⅱ		Liver								N0	M0
Tumor/paired adjacent normal	4	Liver	man	61	NO	YES	NO	Hepatocellular Carcinoma	Ⅱ	3*5cm、5*6cm	Right anterior lobe of liver and left lobe of liver	Meso plasmic						T3	N0	M0	3	Cirrhosis,hepatitis B
Tumor/paired adjacent normal	5	Liver	man	41	NO	YES	NO	Hepatocellular Carcinoma	Ⅱ	2*3cm	Right posterior lobe of liver	Hard plasmic					Blood vessel		N0	M0		Cirrhosis,hepatitis B
Tumor/paired adjacent normal	6	Liver	man	53	NO	YES	NO	Hepatocellular Carcinoma	Ⅱ	4*4*5cm；5.5*3*1.5cm	Right anterior lobe of liver	Meso plasmic			Polynodular type		Blood vessel	T3	N0	M0	3	Cirrhosis,hepatitis B
Tumor/paired adjacent normal	7	Liver	woman	23	NO	YES	NO	Hepatocellular Carcinoma	Ⅱ	9cm	Right inferior lobe of liver	Soft plasmic	Gray white,gray brown		Nodular type	Invasive growth			N0	M0
Tumor/paired adjacent normal	8	Liver	man	70	NO	YES	NO	Hepatocellular Carcinoma	Ⅱ	6cm	Located in paragraph IV and partially dependent on paragraphs II and III	Meso plasmic					Blood vessel, cancer thrombus was found in the left branch and trunk of portal vein	T3	N0	M0	3	Cirrhosis,hepatitis B
Tumor/paired adjacent normal	9	Liver	man	62	NO	YES	NO	Hepatocellular Carcinoma	Ⅱ	7cm	Located at the junction of segments V and VIII and partially dependent on segment VII	Meso plasmic						T2	N0	M0	2	Cirrhosis,hepatitis B
Tumor/paired adjacent normal	10	Liver	man	42	NO	YES	NO	Hepatocellular Carcinoma	Ⅱ	5*4*4cm	Located at the junction of segments VII and VIII	Meso plasmic					Blood vessel	T2	N0	M0	2	Cirrhosis,hepatitis B
Tumor/paired adjacent normal	11	Liver	man	64	NO	YES	NO	Hepatocellular Carcinoma	Ⅱ	6cm；2*1.5cm	Middle lobe of liver	Meso plasmic	Gray white		Nodular type				N0	M0
Tumor/paired adjacent normal	12	Liver	man	62	NO	YES	NO	Hepatocellular Carcinoma	Ⅱ	4*3*3cm	Right lobe of liver	Meso plasmic	Gray white						N0	M0
Tumor/paired adjacent normal	13	Liver	man	47	NO	YES	NO	Hepatocellular Carcinoma	Ⅱ-Ⅲ	13.2*8.6	Left liver		Gray white	YES	Coarse beam type				N0	M0		Hepatitis B
Tumor/paired adjacent normal	14	Liver	man	51	NO	YES	NO	Hepatocellular Carcinoma	Ⅱ-Ⅲ		Inferior segment of left lateral lobe of liver				Infiltrating type				N0	M0
Tumor/paired adjacent normal	15	Liver	man	59	NO	YES	NO	Hepatocellular Carcinoma	Ⅱ-Ⅲ		Upper segment of posterior lobe of right liver (segment Ⅶ)				Nodular type				N0	M0
Tumor/paired adjacent normal	16	Liver	man	41	NO	YES	NO	Hepatocellular Carcinoma	Ⅱ-Ⅲ	5*4.5*4	Liver		Gray white, sallow						N0	M0
Tumor/paired adjacent normal	17	Liver	man	68	NO	YES	NO	Hepatocellular Carcinoma	Ⅱ-Ⅲ	5*4.5*4	The tumor was located in segment Ⅴ	Soft plasmic					Blood vessel		N0	M0		Cirrhosis,hepatitis B
Tumor/paired adjacent normal	18	Liver	man	62	NO	YES	NO	Hepatocellular Carcinoma	Ⅱ-Ⅲ	6cm	At the diaphragmatic roof of the right lobe of the liver (Section Ⅷ)	Meso plasmic					Blood vessel		N0	M0		Cirrhosis,hepatitis B
Tumor/paired adjacent normal	19	Liver	man	53	NO	YES	NO	Hepatocellular Carcinoma	Ⅱ-Ⅲ	7cm	Nude LIVER area on the diaphragmatic surface of the right lobe of the liver	Meso plasmic			Nodular type		Blood vessel	T3	N0	M0	3	Cirrhosis,hepatitis B
Tumor/paired adjacent normal	20	Liver	woman	69	NO	YES	NO	Hepatocellular Carcinoma	Ⅱ-Ⅲ	7cm，multifocus	The tumor is located in segment Ⅵ	Hard plasmic			Multiple fusion type		Blood vessel	T3	N0	M0	3	Cirrhosis,hepatitis B
Tumor/paired adjacent normal	21	Liver	man	59	NO	YES	NO	Hepatocellular Carcinoma	Ⅱ-Ⅲ	4.5*4.5*4cm	Posterior lobe of right liver						Cancer thrombus was found in the vessel		N0	M0
Tumor/paired adjacent normal	22	Liver	woman	60	NO	YES	NO	Hepatocellular Carcinoma	Ⅱ-Ⅲ	4*3*3cm	Right liver					Part of the capsule protrudes			N0	M0
Tumor/paired adjacent normal	23	Liver	man	53	NO	YES	NO	Hepatocellular Carcinoma	Ⅱ-Ⅲ	10*8cm	Located in the right posterior lobe and partially involving the right anterior lobe	Meso plasmic					Blood vessel	T2	N0	M0	2	Cirrhosis,hepatitis B
Tumor/paired adjacent normal	24	Liver	woman	65	NO	YES	NO	Hepatocellular Carcinoma	Ⅱ-Ⅲ	7cm	Located in segment V, partially involved in segments VI and VIII, right rear of the gallbladder bed	Meso plasmic					Blood vessel	T3	N0	M0	3	Cirrhosis,hepatitis B
Tumor/paired adjacent normal	25	Liver	man	55	NO	YES	NO	Hepatocellular Carcinoma	Ⅱ-Ⅲ	6cm	Posterior to the right branch of the portal vein, involving segments V and VIII and a small part VI and VII	Meso plasmic					Blood vessel, cancer thrombus was found in the right branch of portal vein	T2	N0	M0	2	Cirrhosis,hepatitis B
Tumor/paired adjacent normal	26	Liver	man	66	NO	YES	NO	Hepatocellular Carcinoma	Ⅱ-Ⅲ	1.5cm	Right lobe of Liver								N0	M0
Tumor/paired adjacent normal	27	Liver	man	73	NO	YES	NO	Hepatocellular Carcinoma	Ⅱ-Ⅲ	2.5cm	Liver		Gray white, sallow				Cancer thrombus was found in the vessel(+), the left branch of portal vein was also seen, and cancer suppository was seen under microscope		N0	M0
Tumor/paired adjacent normal	28	Liver	woman	54	YES	YES	NO	Hepatocellular Carcinoma	Ⅲ	12*13cm	Right posterior lobe of liver	Hard plasmic						T4	N0	M1	4
Tumor/paired adjacent normal	29	Liver	man	43	NO	YES	NO	Hepatocellular Carcinoma	Ⅲ	5.5*3*3cm	Left liver		Gray white			Invasion of the hepatic capsule	Cancer thrombus was found in the vessel(+), the left branch of portal vein was also seen, and cancer suppository was seen under microscope		N0	M0
Tumor/paired adjacent normal	30	Liver	man	42	NO	YES	NO	Hepatocellular Carcinoma	Ⅳ	7.1*5	Right lobe of liver		Gray white	YES	Fine beam type				N0	M0		Hepatitis B
